# Supplementary material for: Phage & phosphatase: a novel phage-based probe for rapid, multi-platform detection of bacteria
Source: Royal Society of Chemistry journal article supplement (doi:10.1039/c5an01181g), 2015-01-01
Supplement: c5an01181g1.pdf [file c5an01181g1.pdf]

## 1 **Phage & Phosphatase: A novel phage-based probe for rapid, multi-platform** 2 **detection of bacteria**

3 S.D. Alcaine<sup>a</sup>, D. Pacito<sup>b</sup>, D.A. Sela<sup>a,b</sup>, and S.R. Nugen<sup>\*a,b</sup>

4 <sup>a</sup> Department of Food Science, University of Massachusetts, Amherst, MA 01003, USA. Email: [snugen@umass.edu](mailto:snugen@umass.edu) Tel: +1 413-545-1025

5 <sup>b</sup> Department of Microbiology, University of Massachusetts, Amherst, MA 01003, USA.

6

### 7 **Supplemental Materials 1**

8 DNA Sequence of *phoA* construct.

9 GAATTC<sup>1</sup>CGTTCTCGAGGCCATGAAGATGGAGACCGAGATCAACGCTCCCACCGACGGCAAGGTCGAG  
10 AAGGTCCTTGTC AAGGAGCGTGACGCCGTGCAGGGCGGT CAGGGTCTCATCAAGATCGGCTGA<sup>2</sup>TGAA  
11 TGAATGAT<sup>3</sup>AATTAATACGACTCACTATAGGGAGA<sup>4</sup>CCACAACGGTTCCCTCTAGAAATAATTTTGTTT  
12 AACTTAAAGAAGGAG<sup>5</sup>ATATACATATG<sup>6</sup>CACCACCACCACCACCAC<sup>7</sup>CATAGCAGCGGTCTGCGTAAA  
13 ATCTGTACTTCCAAGGC<sup>8</sup>CACATGTCTAGTGTC<sup>9</sup>AAACAATCCACCATCGCACTGGCCCTGCTGCCGCTG  
14 CTGTTACGCCGGTCACGAAGGCTCGCACCCCGGAAATGCCGGTCTGGAAAACCGTGCAGCACAAG  
15 GTGATATTACCGCACCGGGCGGTGCCCGTGCCTGACCGGTGACCAGACGGCAGCTCTGCGCGATAGC  
16 CTGTCTGACAAACCGGCGAAGAACATTATCCTGCTGATTGGTGATGGCATGGGTGACTCTGAAATCAC  
17 CGCCGCGCGTAATTATGCAGAAGGCGCGGGCGGCTTTTTCAAAGGTATCGATGCACTGCCGCTGACCG  
18 GCCAGTATACGCATTACGCGCTGAACAAAAAGACGGGTAAACCGGATTATGTTACCGACAGTGCAGCT  
19 TCCGCAACCGCATGGAGCACGGGTGTTAAACCTACAATGGCGCCCTGGGTGTCGATATTCATGAAAA  
20 AGACCACCCGACCATCCTGGAAATGGCTAAGGCGGGCGGGTCTGGCGACGGGTAATGTCTCTACCGCTG  
21 AACTGCAGGATGCAACGCCGGCAGCTCTGGTGGCGCACGTTACCAGTCGTAATGCTACGGTCCGTCA  
22 GCCACGTCGGAAAAGTGTCCGGGCAACGCACTGGAAAAAGGCGGTAAAGGTTTCGATTACCGAACAGC  
23 TGCTGAATGCACGCGCTGATGTGACGCTGGGCGGTGGCGCAAAAACCTTTGCTGAAACCGCGACGGCC  
24 GCGAATGGCAAGGTAAAACGCTGCGTGAACAGGCACAAGCTCGCGGCTATCAGCTGGTTAGCGATG  
25 CGGCCAGCCTGAACTCTGTTACCGAAGCCAATCAGCAAAAACCGCTGCTGGGCCTGTTTCGCAGATGGT  
26 AACATGCCGGTGC GTTGGCTGGGTCCGAAAGCAACCTACCATGGTAATATTGATAAGCCGGCCGTAC  
27 CTGCACGCCGAACCCGCAACGCAATGATAGCGTGCCGACGCTGGCCCAGATGACCGACAAAGCAATC  
28 GAACTGCTGTCGAAAAACGAAAAGGGCTTTTTCTGCAGGTTGAAGGTGCCAGCATTGATAACAAGA  
29 CCACGCAGCTAATCCGTGTGGCCAGATCGGTGAAACCGTCGATCTGGACGAAGCGGTGCAGCGTGCCC

30 TGGAATTTGCGAAGAAAGAAGGCAACACGCTGGTCATTGTGACCGCCGATCATGCGCACGCCTCCCAA  
31 ATCGTTGCCCCGGACACCAAAGCACCGGGTCTGACGCAGGCTCTGAACACCAAGGATGGCGCGGTTAT  
32 GGTCATGAGTTATGGTAATCCGAAGAAGACTCACAGGAACATAACCGGCTCACAACTGCGTATCGCAG  
33 CCTACGGTCCGCACGCAGCTAATGTGGTTGGCCTGACGGATCAAACCGACCTGTTCTACACGATGAAA  
34 GCAGCACTGGGTCTGAAACCGTCGTCGCCGTCGC<sup>11</sup>TAATAA<sup>12</sup>GTCGAC<sup>13</sup>AAGCTT<sup>14</sup>

35 Sequence Length: 1743 bp

36 Sequence Features: (1) EcoRI restriction site. (2) 1.3s biotin subunit from *Propionibacterium shermanii*  
37 transcarboxylase (3) Stop codons in all three reading frames. (4) T7 Promoter. (5) Ribosome Binding Sequence. (6)  
38 Start codon. (7) Histidine tag. (8) TEV cleavage recognition site. (10) Start of alkaline phosphatase. (11) Arginine  
39 tag. (12) Stop codons. (13) SalI restriction site. (14) HindIII restriction site.
